# Supplementary material
Source: Springer Nature journal article supplement (https://www.springermedizin.de/resource/supplementary/13058_2010_9483_MOESM3_ESM.pdf/9702266)

**A**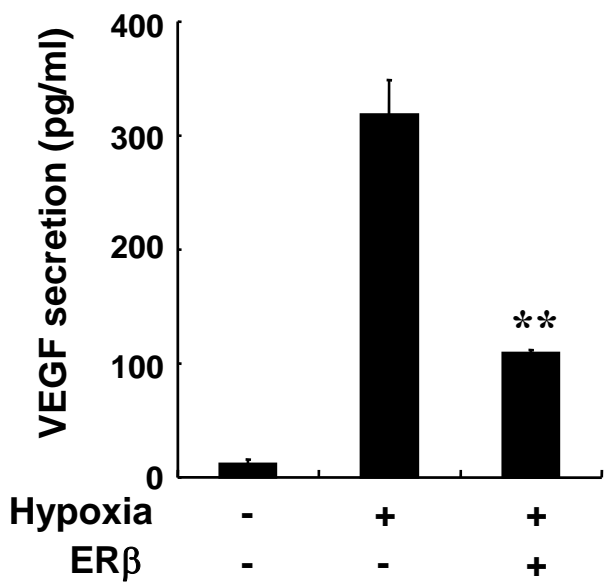**B**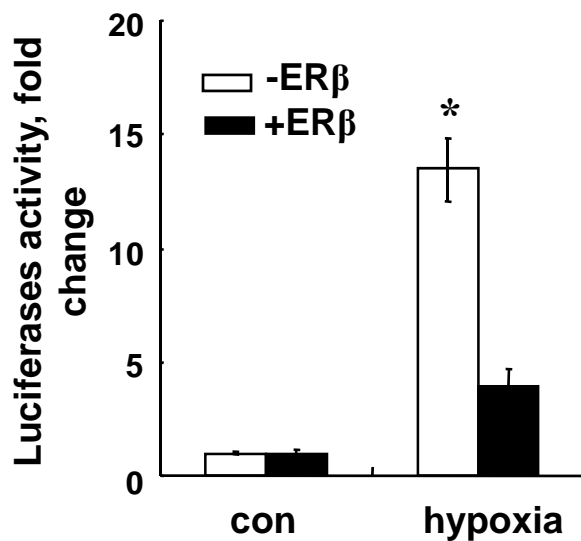**C**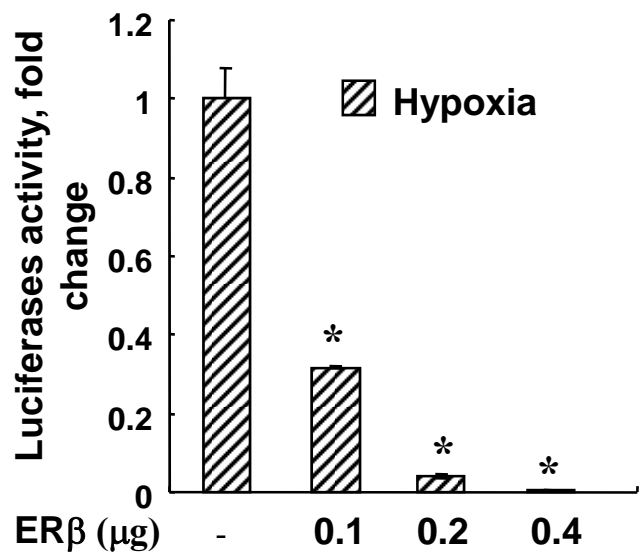**D**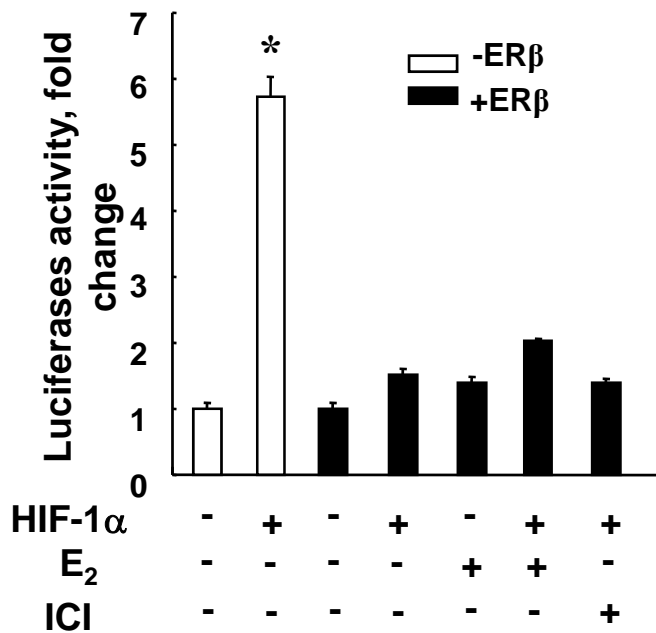

Supplement: MOESM3 [file 9702266]
